# Supplementary material for: Novel Amphiphilic, Biodegradable, Biocompatible, Thermo-Responsive ABA Triblock Copolymers Based on PCL and PEG Analogues via a Combination of ROP and RAFT: Synthesis, Characterization, and Sustained Drug Release from Self-Assembled Micelles
Source: PubMed Central journal article supplement (PMC6415266; doi:10.3390/polym10020214), 2018-02-22
Supplement: polymers-10-00214-s001.pdf [file polymers-10-00214-s001.pdf]

# Supplementary Materials

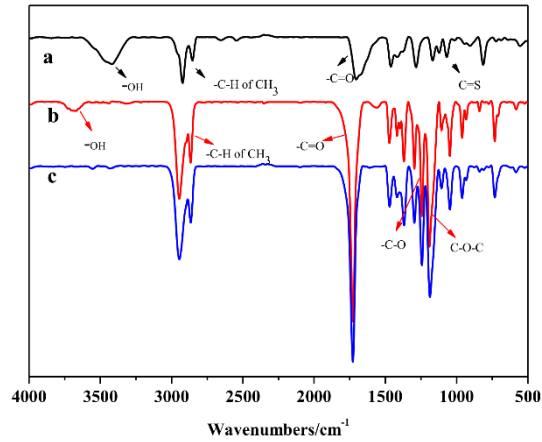

**Figure S1.** FT-IR spectra of CTA (a), OH-*b*-PCL-*b*-OH (b), and CTA-*b*-PCL-*b*-CTA (c).

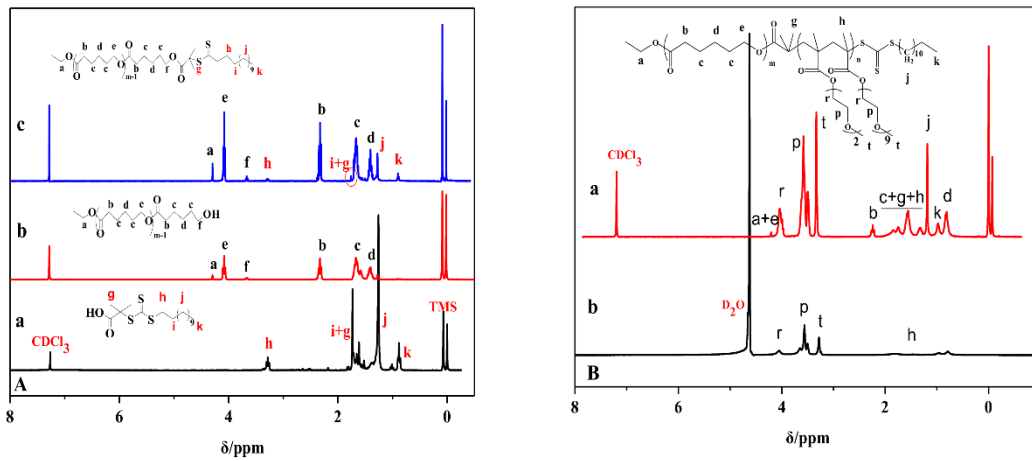

**Figure S2.**  $^1\text{H}$  NMR spectra : (A) of CTA (a), OH-*b*-PCL-*b*-OH (b) and CTA-*b*-PCL-*b*-CTA (c); (B) of the triblock copolymer of P(MEO<sub>2</sub>MA-*co*-OEGMA)-*b*-PCL-*b*-P(MEO<sub>2</sub>MA-*co*-OEGMA) in CDCl<sub>3</sub> (a) and D<sub>2</sub>O (b) at room temperature.

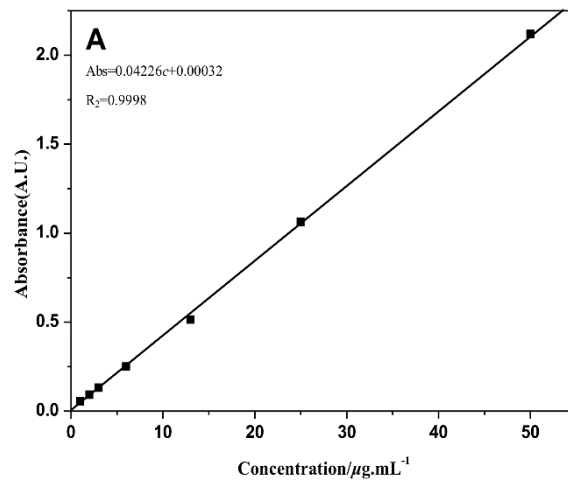

**Figure S3.** Calibration curve for anethole-loaded drug release.

**Table S1.** Characterization of various copolymers.

| Samples | DPCL <sup>a</sup> | [M]:[O]<br><sub>0</sub> <sup>b</sup> | DP <sup>c</sup> | M <sub>n</sub> , Theory <sup>d</sup><br>(g/mol) | M <sub>n</sub> , GPC <sup>e</sup><br>(g/mol) | PDI <sup>e</sup> |
|---------|-------------------|--------------------------------------|-----------------|-------------------------------------------------|----------------------------------------------|------------------|
| tB1     | 30                | -                                    | -               | 3486                                            | 3716                                         | 1.54             |
| tB2     | 30                | -                                    | -               | 4178                                            | 4349                                         | 1.46             |
| tBP1    | 30                | 97:3                                 | 220             | 47,479                                          | 54,775                                       | 1.16             |
| tBP2    | 30                | 97:3                                 | 250             | 53,384                                          | 57,485                                       | 1.06             |
| tBP3    | 30                | 97:3                                 | 280             | 59,289                                          | 61,571                                       | 1.01             |
| tBP4    | 30                | 92:8                                 | 250             | 56,969                                          | 59,605                                       | 1.04             |
| tBP5    | 30                | 87:13                                | 250             | 60,553                                          | 64,450                                       | 1.11             |

tB1 and tB2 represent the OH-PCL-OH and CTA-PCL-CTA. tBP represents the P(MEO<sub>2</sub>MA-co-OEGMA)-*b*-PCL-*b*-P(MEO<sub>2</sub>MA-co-OEGMA). DPCL <sup>a</sup> is the DP of PCL segments. [M]:[O]<sub>0</sub><sup>b</sup> is the initial molar ratio of MEO<sub>2</sub>MA and OEGMA, DP <sup>c</sup> is the DP of monomers' segments. <sup>d</sup> Calculated theory analysis from the feed ratio of monomers to macro-chain transfer agents. <sup>e</sup> Determined by GPC with THF as the eluent and polystyrene as the standard.

**Table S2.** The PDI values of tBP3 for the DLS data as a function of the temperature.

| T (°C)                           | 25    | 27    | 29    | 31    | 33    | 35    |
|----------------------------------|-------|-------|-------|-------|-------|-------|
| Size-average (d/nm) <sup>a</sup> | 37    | 39    | 41    | 43    | 45    | 50    |
|                                  | 129.5 | 130.6 | 132.6 | 253.8 | 341.2 | 348.6 |
|                                  | 343.9 | 337.4 | 328.8 | 310.1 | 310.7 | 297.4 |
| PDI <sup>a</sup>                 | 0.247 | 0.254 | 0.225 | 0.081 | 0.027 | 0.031 |
|                                  | 0.128 | 0.017 | 0.052 | 0.115 | 0.124 | 0.250 |

<sup>a</sup> Determined by DLS in water (2mg mL<sup>-1</sup>).

**Table S3.** Properties of tBP3 micelles with and without anethole.

| Samples              | Drug/Polymer <sup>a</sup><br>(mg/mg) | Size-Average <sup>b</sup><br>(d/nm) | PDI <sup>b</sup> | DL <sup>c</sup><br>(wt%) | EE <sup>d</sup><br>(wt%) |
|----------------------|--------------------------------------|-------------------------------------|------------------|--------------------------|--------------------------|
| tBP3                 | 0/20                                 | 105.8                               | 0.300            | -                        | -                        |
| A <sub>1</sub> -tBP3 | 2/20                                 | 144.1                               | 0.157            | 5.1                      | 56.1                     |
| A <sub>2</sub> -tBP3 | 4/20                                 | 162.5                               | 0.150            | 7.9                      | 47.4                     |

<sup>a</sup> In feed; <sup>b</sup> Determined by DLS in water (1mg mL<sup>-1</sup>); <sup>c</sup> Determined by UV absorbance.

**Table S4.** The properties of tBP's micelles with and without anethole.

| Samples | Blank                               |                  | A-Loaded Micelles                   |                  | DL <sup>c</sup><br>(wt%) | EE <sup>d</sup><br>(wt%) |
|---------|-------------------------------------|------------------|-------------------------------------|------------------|--------------------------|--------------------------|
|         | Size-Average <sup>a</sup><br>(d/nm) | PDI <sup>b</sup> | Size-Average <sup>a</sup><br>(d/nm) | PDI <sup>b</sup> |                          |                          |
| tBP1    | 149.9                               | 0.291            | 206.9                               | 0.171            | 5.7                      | 63.3                     |
| tBP2    | 119.9                               | 0.320            | 163.9                               | 0.194            | 5.3                      | 58.9                     |
| tBP3    | 105.8                               | 0.300            | 144.1                               | 0.157            | 5.1                      | 56.1                     |

<sup>a,b</sup> Determined by DLS in water in water (1mg mL<sup>-1</sup>); <sup>c</sup> Determined by UV absorbance.
